# Supplementary material for: Exploring the kinetic and thermodynamic aspects of four-electron electrochemical reactions: electrocatalysis of oxygen evolution by metal oxides and biological systems
Source: Royal Society of Chemistry journal article supplement (doi:10.1039/c6cp03500k), 2016-01-01
Supplement: c6cp03500k2.pdf [file c6cp03500k2.pdf]

**Exploring kinetic and thermodynamic aspects of four-electron electrochemical reactions: electrocatalysis of oxygen evolution by metal oxides and biological systems**

Vincent C.-C. Wang<sup>1,2</sup>

1. Shouxing Street, Yancheng, Kaohsiung 803, Taiwan (R.O.C)

2. Institute of Chemistry, Academia Sinica, Nangang, Taipei 115, Taiwan (R.O.C)

**Supporting information**

**Figure S1**

According to the Rossemeisl *et. al.* paper, the scaling relation between the adsorption energy of HO and HOO over a wide range of metal oxide surface is  $\Delta E_{\text{HOO}^*} = \Delta E_{\text{HO}^*} + 3.2 \text{ eV}$ .<sup>1</sup> In order to find the relation between the free energy of each reaction step and  $\Delta E_{\text{O}^*}$ , the scaling relation between  $\Delta E_{\text{HO}^*}$  and  $\Delta E_{\text{O}^*}$  is obtained by a linear fitting of  $\Delta E_{\text{HO}^*}$  and  $\Delta E_{\text{O}^*}$  values over all metal oxides from the same paper. The best fit is  $\Delta E_{\text{HO}^*} = 0.5\Delta E_{\text{O}^*} - 0.4 \text{ eV}$  as shown in Figure S1. With these two scaling relations and the correction of entropy and zero-point energy contribution, the free energy of each reaction step can be expressed with  $\Delta E_{\text{O}^*}$  as follows:  $\Delta G_1 = 0.5\Delta E_{\text{O}^*} - 0.05 \text{ eV}$ ,  $\Delta G_2 = 0.5\Delta E_{\text{O}^*} + 0.1 \text{ eV}$ ,  $\Delta G_3 = -0.5\Delta E_{\text{O}^*} + 3.15 \text{ eV}$ ,  $\Delta G_4 = -0.5\Delta E_{\text{O}^*} + 1.72 \text{ eV}$ .

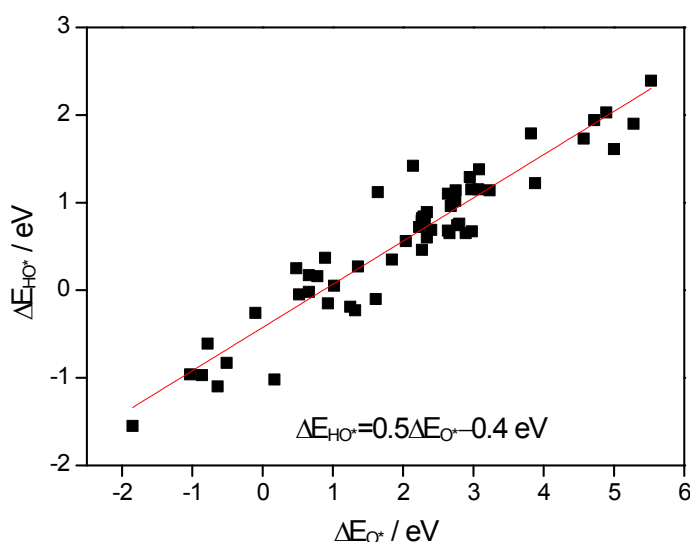

**Figure S1** The correlation between calculated  $\Delta E_{\text{HO}^*}$  and  $\Delta E_{\text{O}^*}$  over a wide range of metal oxide surface. The red line indicates the best fitting line with a square root of

0.9 and a standard deviation of 0.06 eV and 0.02 eV for the slope and intercept respectively.

**Figure S2**

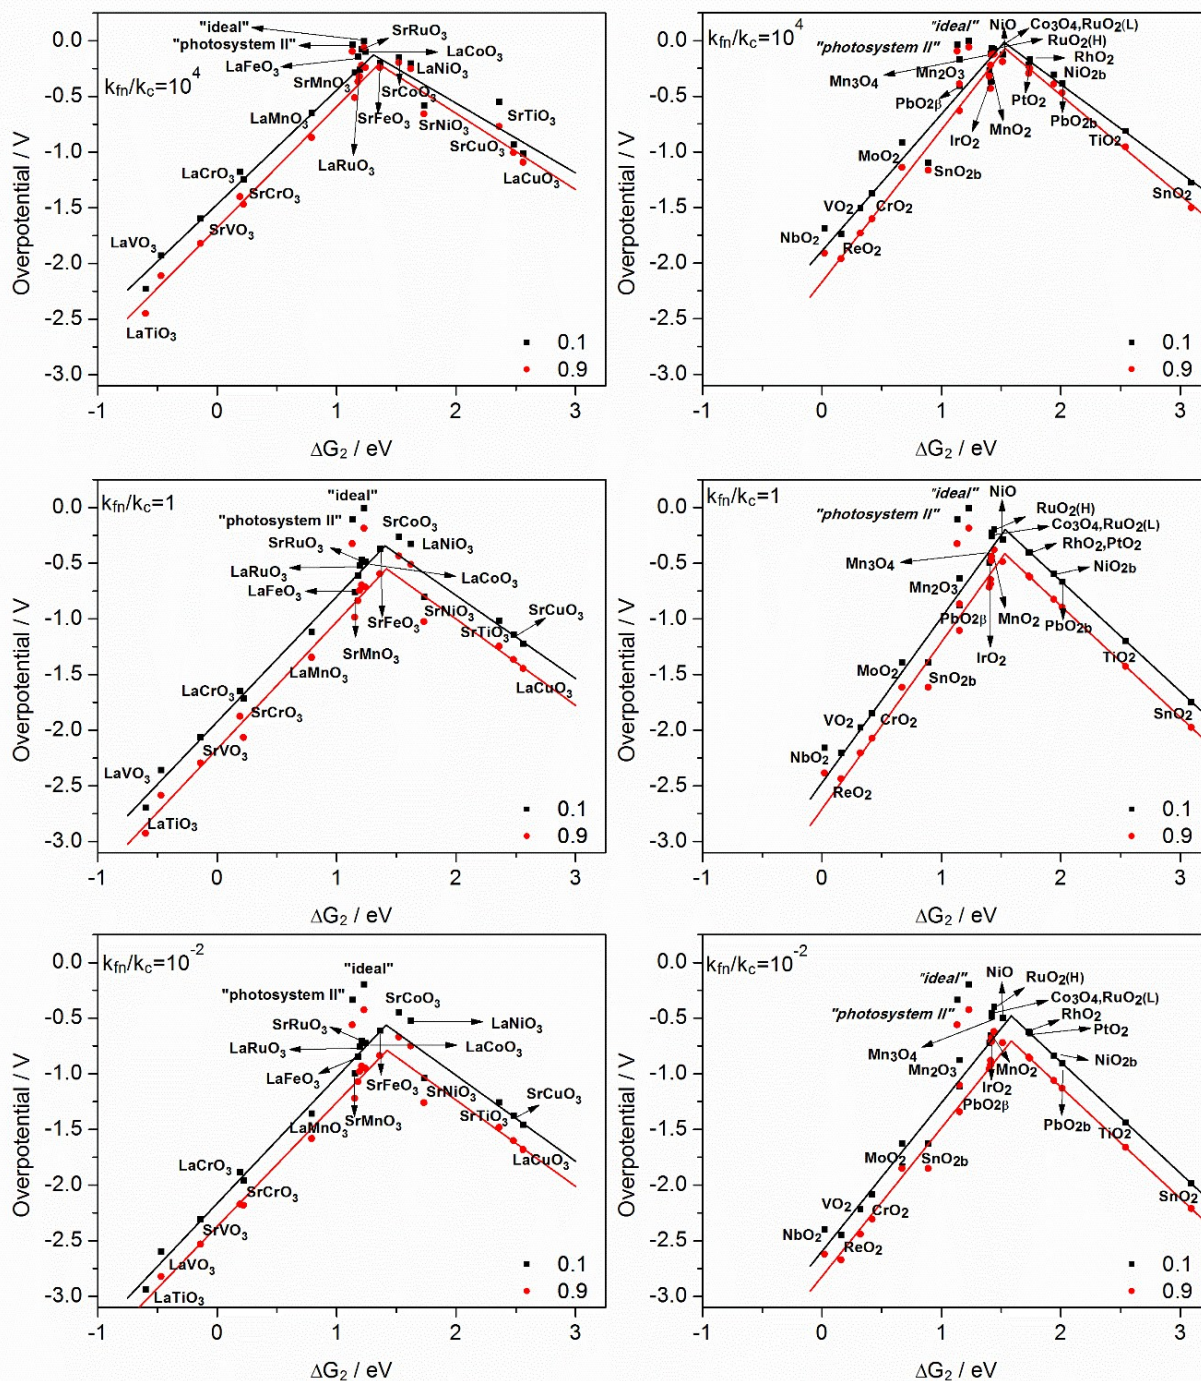

**Figure S2** The plot of the overpotential value for the OER against the free energy  $\Delta G_2$  when the overpotential value is taken at the current, 0.1 (back square) and 0.9 (red circle). A ratio of  $k_{fm}/k_c$  used for simulation is depicted in the figures.

Figure S3

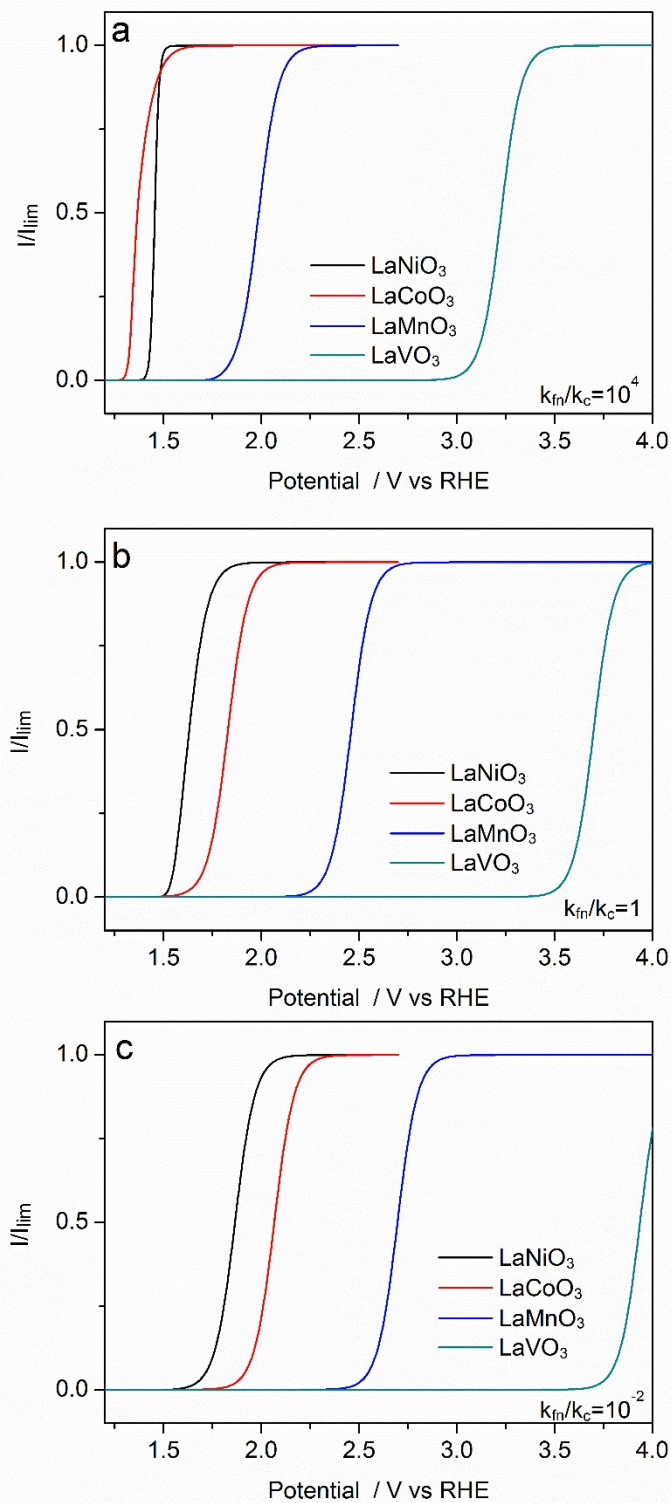

**Figure S3** The simulation of voltammograms for LaNiO<sub>3</sub>, LaCoO<sub>3</sub>, LaMnO<sub>3</sub> and LaVO<sub>3</sub> with a ratio of  $k_{fn}/k_c = 10^4$ , 1 and  $10^{-2}$  respectively.



**Table S1** The summary of the free energy used for simulations <sup>1</sup> and Tafel slope values obtained from metal oxides and photosystem II studied in this paper.

|                             | Free Energy       |                   |                   |                   | Tafel slope (mV/decade) <sup>a</sup> |                              |                        |                               |
|-----------------------------|-------------------|-------------------|-------------------|-------------------|--------------------------------------|------------------------------|------------------------|-------------------------------|
|                             | $\Delta G_1$ (eV) | $\Delta G_2$ (eV) | $\Delta G_3$ (eV) | $\Delta G_4$ (eV) | <sup>b</sup> 10 <sup>4</sup>         | <sup>b</sup> 10 <sup>2</sup> | <sup>b</sup> 1         | <sup>b</sup> 10 <sup>-2</sup> |
| Metal oxide <sup>d</sup>    |                   |                   |                   |                   |                                      |                              |                        |                               |
| SrTiO <sub>3</sub>          | 1.57              | 2.36              | 0.98              | 0.01              | 118(0.5) <sup>c</sup>                | 133(0.44)                    | 132(0.45)              | 120(0.49)                     |
| SrVO <sub>3</sub>           | 0.09              | -0.14             | 3.41              | 1.56              | 131(0.45)                            | 132(0.45)                    | 132(0.45)              | 132(0.45)                     |
| SrCrO <sub>3</sub>          | 0.72              | 0.22              | 3.06              | 0.92              | 131(0.45)                            | 132(0.45)                    | 132(0.45)              | 132(0.45)                     |
| SrMnO <sub>3</sub>          | 1.17              | 1.15              | 2.1               | 0.5               | 130(0.45)                            | 132(0.45)                    | 129(0.46)              | 128(0.46)                     |
| SrFeO <sub>3</sub>          | 1.64              | 1.36              | 1.7               | 0.22              | 27(2.19)                             | 30(1.97)                     | 143(0.41);<br>34(1.74) | 130(0.45)                     |
| SrCoO <sub>3</sub>          | 1.5               | 1.52              | 1.44              | 0.46              | 27(2.19)                             | 28(2.11)                     | 117(0.50);<br>33(1.79) | 130(0.45)                     |
| SrNiO <sub>3</sub>          | 2.14              | 1.73              | 1.07              | -0.02             | 44(1.34)                             | 50(1.18)                     | 118(0.5)               | 133(0.44)                     |
| SrCuO <sub>3</sub>          | 2.29              | 2.48              | 0.55              | -0.4              | 43(1.37)                             | 49(1.20)                     | 150(0.39);<br>68(0.87) | 133(0.44)                     |
| SrRuO <sub>3</sub>          | 1.07              | 1.21              | 1.81              | 0.83              | 44(1.34)                             | 133(0.44)                    | 133(0.44)              | 132(0.45)                     |
| LaTiO <sub>3</sub>          | -1.2              | -0.6              | 4.04              | 2.68              | 114(0.52)                            | 131(0.45)                    | 132(0.45)              | 123(0.48)                     |
| LaVO <sub>3</sub>           | -0.26             | -0.47             | 3.7               | 1.95              | 132(0.45)                            | 130(0.45)                    | 131(0.45)              | 131(0.45)                     |
| LaCrO <sub>3</sub>          | 0.52              | 0.19              | 2.99              | 1.22              | 131(0.45)                            | 132(0.45)                    | 132(0.45)              | 132(0.45)                     |
| LaMnO <sub>3</sub>          | 0.62              | 0.79              | 2.46              | 1.05              | 120(0.49)                            | 131(0.45)                    | 132(0.45)              | 132(0.45)                     |
| LaFeO <sub>3</sub>          | 1.14              | 1.1775            | 1.9525            | 0.65              | 174(0.34);<br>64(0.92)               | 131(0.45)                    | 131(0.45)              | 131(0.45)                     |
| LaCoO <sub>3</sub>          | 1.45              | 1.24              | 1.83              | 0.4               | 111(0.53)                            | 133(0.44)                    | 131(0.45)              | 132(0.45)                     |
| LaNiO <sub>3</sub>          | 1.5               | 1.62              | 1.5               | 0.3               | 27(2.19)                             | 33(1.79)                     | 118(0.5);<br>39(1.51)  | 130(0.45)                     |
| LaCuO <sub>3</sub>          | 2.38              | 2.56              | 0.46              | -0.48             | 44(1.34)                             | 48(1.23)                     | 151(0.39);<br>59(1)    | 131(0.45)                     |
| LaRuO <sub>3</sub>          | 0.7               | 1.19              | 1.86              | 1.17              | 34(1.74)                             | 146(0.4);<br>49(1.20)        | 131(0.45)              | 131(0.45)                     |
| --                          | --                | --                | --                | --                | --                                   | --                           | --                     | --                            |
| Photosystem II <sup>d</sup> | 1.2               | 1.13              | 1.44              | 1.15              | 29(2.03)                             | 35(1.69)                     | 59(1);<br>158(0.37)    | 131(0.45)                     |
| optimal                     | 1.23              | 1.23              | 1.23              | 1.23              | 35(1.69)                             | 28(2.11)                     | 30(1.97);<br>136(0.43) | 131(0.45)                     |

|                                     | Free energy       |                   |                   |                   | Tafel slope (mV/decade) <sup>a</sup> |                              |                        |                               |
|-------------------------------------|-------------------|-------------------|-------------------|-------------------|--------------------------------------|------------------------------|------------------------|-------------------------------|
|                                     | $\Delta G_1$ (eV) | $\Delta G_2$ (eV) | $\Delta G_3$ (eV) | $\Delta G_4$ (eV) | <sup>b</sup> 10 <sup>4</sup>         | <sup>b</sup> 10 <sup>2</sup> | <sup>b</sup> 1         | <sup>b</sup> 10 <sup>-2</sup> |
| Metal oxide <sup>d</sup>            |                   |                   |                   |                   |                                      |                              |                        |                               |
| MoO <sub>2</sub>                    | 0.4               | 0.67              | 2.73              | 1.12              | 130(0.45) <sup>c</sup>               | 132(0.45)                    | 130(0.45)              | 131(0.45)                     |
| IrO <sub>2</sub>                    | 0.25              | 1.41              | 1.76              | 1.5               | 33(1.79)                             | 35(1.69)                     | 49(1.20);<br>131(0.45) | 132(0.45)                     |
| RuO <sub>2</sub> (high coverage)    | 1.31              | 1.42              | 1.59              | 0.6               | 31(1.90)                             | 42(1.40)                     | 69(0.86);<br>161(0.37) | 132(0.45)                     |
| PtO <sub>2</sub>                    | 1.09              | 1.73              | --                | --                | 44(1.34)                             | 46(1.28)                     | 56(1.05);<br>152(0.39) | 132(0.45)                     |
| RhO <sub>2</sub>                    | 1.11              | 1.74              | 1.31              | 0.76              | 44(1.34)                             | 51(1.16)                     | 69(0.86);<br>140(0.42) | 132(0.45)                     |
| NbO <sub>2</sub>                    | -0.48             | 0.02              | 3.5               | 1.88              | 132(0.45)                            | 132(0.45)                    | 132(0.45)              | 132(0.45)                     |
| ReO <sub>2</sub>                    | -0.75             | 0.16              | 3.55              | 1.96              | 118(0.5)                             | 131(0.45)                    | 132(0.45)              | 132(0.45)                     |
| VO <sub>2</sub>                     | 0.51              | 0.32              | 3.32              | 0.77              | 132(0.45)                            | 131(0.45)                    | 132(0.45)              | 132(0.45)                     |
| MnO <sub>2</sub>                    | 1.73              | 1.4               | 1.8263            | -0.0363           | 27(2.19)                             | 39(1.51)                     | 131(0.45)              | 132(0.45)                     |
| CrO <sub>2</sub>                    | 1.77              | 0.42              | 3.18601           | -0.45601          | 132(0.45)                            | 132(0.45)                    | 132(0.45)              | 132(0.45)                     |
| NiO <sub>2b</sub>                   | 1                 | 1.94              | 1.3157            | 0.6643            | 45(1.31)                             | 50(1.18);<br>133(0.44)       | 131(0.45)              | 133(0.44)                     |
| PbO <sub>2b</sub>                   | 1.02              | 2.01              | 1.4109            | 0.4791            | 44(1.34)                             | 51(1.16);<br>135(0.44)       | 131(0.45)              | 131(0.45)                     |
| SnO <sub>2b</sub>                   | -0.67             | 0.89              | 2.7309            | 1.9691            | 34(1.74)                             | 54(1.09);<br>142(0.42)       | 130(0.45)              | 131(0.45)                     |
| Mn <sub>3</sub> O <sub>4</sub>      | 1.04              | 1.41              | 1.8               | 0.67              | 46(1.28)                             | 66(0.89);<br>152(0.39)       | 132(0.45)              | 132(0.45)                     |
| Mn <sub>2</sub> O <sub>3</sub> (II) | 1.19              | 1.15              | 1.98              | 0.6               | 77(0.77);<br>147(0.40)               | 132(0.45)                    | 131(0.45)              | 131(0.45)                     |
| Co <sub>3</sub> O <sub>4</sub>      | 1.37              | 1.42              | 1.55              | 0.58              | 27(2.19)                             | 33(1.79)                     | 131(0.45)              | 131(0.45)                     |
| TiO <sub>2</sub>                    | 2.74              | 2.84              | --                | --                | 44(1.34)                             | 45(1.31)                     | 48(1.23);<br>121(0.49) | 131(0.45)                     |
| SnO <sub>2</sub>                    | 2.25              | 3.08              | --                | --                | 131(0.45)                            | 131(0.45)                    | 132(0.45)              | 132(0.45)                     |
| PtO <sub>2β</sub>                   | 1.17              | 1.19              | 1.8342            | 0.7258            | 48(1.23);<br>148(0.40)               | 130(0.45)                    | 131(0.45)              | 132(0.45)                     |
| RuO <sub>2</sub> (low coverage)     | 0.95              | 1.44              | 1.48              | 1.05              | 23(2.57)                             | 41(1.44)                     | 50(1.18);<br>136(0.43) | 130(0.45)                     |
| --                                  | --                | --                | --                | --                | --                                   | --                           | --                     | --                            |
| Photosystem II <sup>d</sup>         | 1.2               | 1.13              | 1.44              | 1.15              | 29(2.03)                             | 35(1.69)                     | 59(1);<br>158(0.37)    | 131(0.45)                     |
| optimal                             | 1.23              | 1.23              | 1.23              | 1.23              | 35(1.69)                             | 28(2.11)                     | 30(1.97);<br>136(0.43) | 131(0.45)                     |

a. The Tafel slope is obtained from the logarithm of current between  $-2.3$  and  $-0.3$ .

- b. The ratio of  $k_{fn}/k_c$  for simulated voltammograms.
- c. The value inside the parentheses is the apparent transfer coefficient.
- d. The adsorption energy for each metal oxide are obtained from the Table 2 of supporting materials of the reference 1 and the values for photosystem II are obtained from the Table 1 of the reference 2.

**Figure S4**

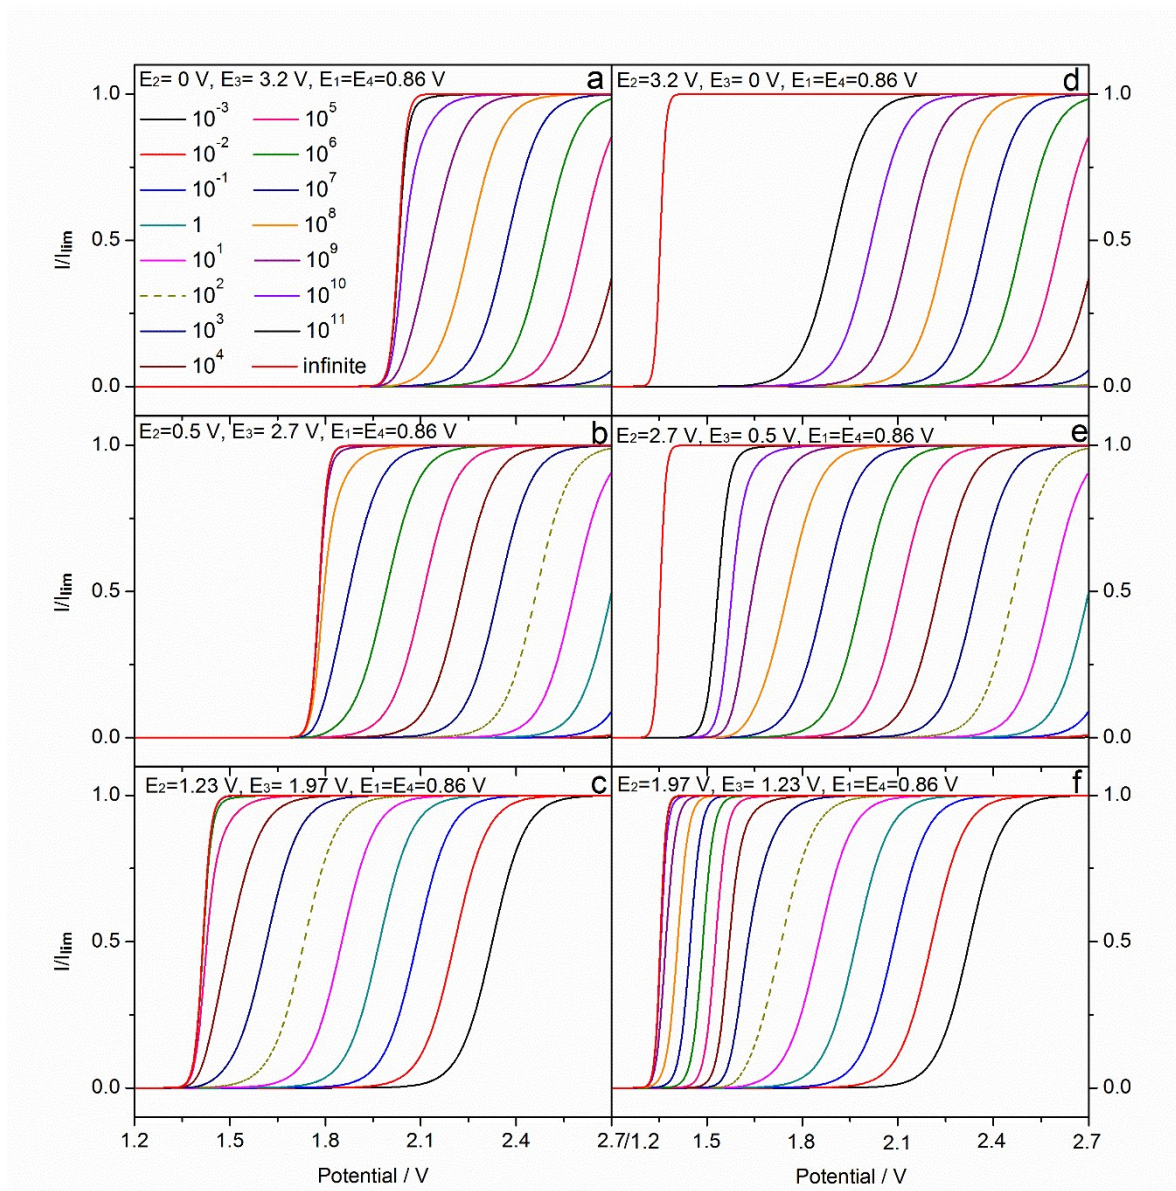

**Figure S4** Simulation of voltammograms with a universal scaling relation  $\Delta G_2 + \Delta G_3 = 3.2$  eV. The equilibrium potentials  $E_1=E_4=0.86$  V were used to simulate voltammograms with varying  $E_2$  and  $E_3$  values. The ratio of  $k_{fn}/k_c$  for simulations is indicated in Figure S4a.

**Figure S5**

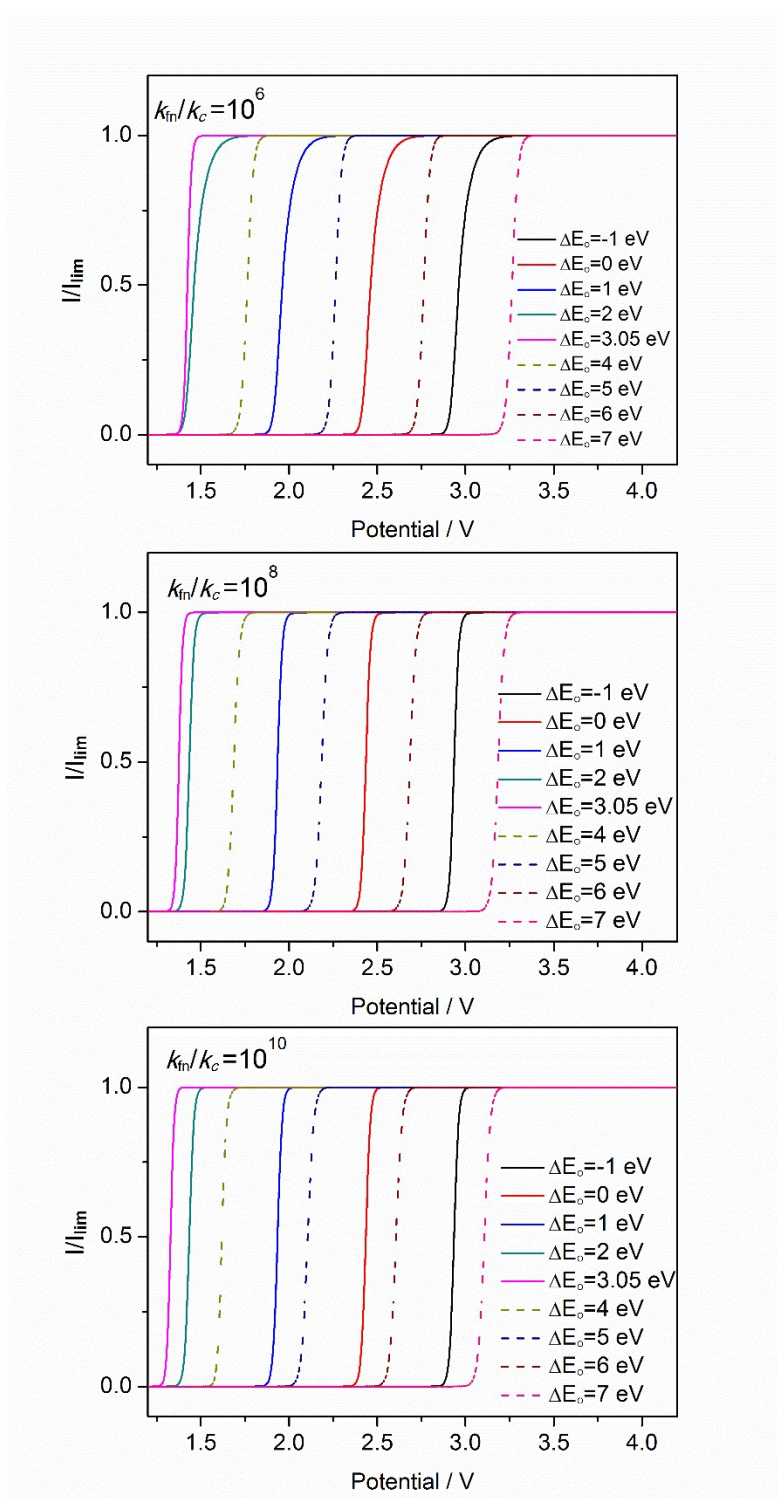

**Figure S5** The effect of the adsorption energy of the intermediate species, oxygen on the activity of OER electrocatalysts.



**Table S2** The summary of the Tafel slope from Figure 5 and Figure S5.

| $k_{f1}/k_2$ | $\Delta E_{O^*}$ (eV)      |               |               |               |               |                                             |                                |                                |                                |                                |
|--------------|----------------------------|---------------|---------------|---------------|---------------|---------------------------------------------|--------------------------------|--------------------------------|--------------------------------|--------------------------------|
|              | -2                         | -1            | 0             | 1             | 2             | 3.05                                        | 4                              | 5                              | 6                              | 7                              |
| $10^{-2}$    | 132<br>(0.45) <sup>a</sup> | 132<br>(0.45) | 132<br>(0.45) | 132<br>(0.45) | 132<br>(0.45) | 129<br>(0.46)                               | 131<br>(0.45)                  | 131<br>(0.45)                  | 131<br>(0.45)                  | 131<br>(0.45)                  |
| 1            | 132<br>(0.45)              | 132<br>(0.45) | 132<br>(0.45) | 132<br>(0.45) | 132<br>(0.45) | 54<br>(1.09);<br>176 <sup>b</sup><br>(0.34) | 72<br>(0.82);<br>171<br>(0.35) | 65<br>(0.91);<br>156<br>(0.38) | 88<br>(0.67);<br>229<br>(0.26) | 72<br>(0.82);<br>129<br>(0.46) |
| $10^2$       | 132<br>(0.45)              | 132<br>(0.45) | 132<br>(0.45) | 132<br>(0.45) | 131<br>(0.45) | 38<br>(1.55)                                | 45<br>(1.31)                   | 47<br>(1.26)                   | 46<br>(1.28)                   | 46<br>(1.28)                   |
| $10^4$       | 119<br>(0.50)              | 114<br>(0.52) | 119<br>(0.50) | 120<br>(0.49) | 118<br>(0.5)  | 29<br>(2.03)                                | 44<br>(1.34)                   | 43<br>(1.37)                   | 43<br>(1.37)                   | 44<br>(1.34)                   |
| $10^6$       | 45<br>(1.31)               | 44<br>(1.34)  | 44<br>(1.34)  | 45<br>(1.31)  | 44<br>(1.34)  | 27<br>(2.19)                                | 45<br>(1.31)                   | 44<br>(1.34)                   | 44<br>(1.34)                   | 44<br>(1.34)                   |
| $10^8$       | 33<br>(1.79)               | 33<br>(1.79)  | 33<br>(1.79)  | 33<br>(1.79)  | 33<br>(1.79)  | 26<br>(2.27)                                | 37<br>(1.59)                   | 44<br>(1.34)                   | 44<br>(1.34)                   | 44<br>(1.34)                   |
| $10^{10}$    | 33<br>(1.79)               | 33<br>(1.79)  | 33<br>(1.79)  | 33<br>(1.79)  | 33<br>(1.79)  | 26<br>(2.27)                                | 28<br>(2.11)                   | 44<br>(1.34)                   | 44<br>(1.34)                   | 44<br>(1.34)                   |
| infinite     | 33<br>(1.79)               | 34<br>(1.74)  | 33<br>(1.79)  | 33<br>(1.79)  | 34<br>(1.74)  | 21<br>(2.81)                                | 21<br>(2.81)                   | 21<br>(2.81)                   | 21<br>(2.81)                   | 21<br>(2.81)                   |

<sup>a</sup> The unit for the Tafel slope inside Table S2 is mV/decade. The Tafel slope is obtained from the logarithm of current between  $-2.3$  and  $-0.3$ . The value inside the parentheses is the apparent transfer coefficient.

<sup>b</sup> Two Tafel slopes were obtained and the smaller value showed first.

### The free energy values for NiOOH and Ni<sub>x</sub>Fe<sub>y</sub>OOH

According to the paper reported by Bell, Nørskov and their co-workers,<sup>3</sup> the scaling relation for pure or doped  $\gamma$ -FeOOH and  $\gamma$ -NiOOH can be described as follows:  $\Delta E_{O^*} = 1.2\Delta E_{HO^*} + 1.9$  eV and  $\Delta E_{HO^*} = 0.83\Delta E_{HO^*} + 3.29$  eV. After correcting contribution from entropy and zero potential energy, the free energy for each step can be described as follows:  $\Delta G_1 = \Delta E_{HO^*} + 0.44$  eV,  $\Delta G_2 = 0.2\Delta E_{HO^*} + 1.56$  eV,  $\Delta G_3 = -0.37\Delta E_{HO^*} + 1.83$  eV,  $\Delta G_4 = -0.83\Delta E_{HO^*} + 1.09$  eV.

## References

1. I. C. Man, H. Y. Su, F. Calle-Vallejo, H. A. Hansen, J. I. Martinez, N. G. Inoglu, J. Kitchin, T. F. Jaramillo, J. K. Nørskov and J. Rossmeisl, *Chemcatchem*, 2011, 3, 1159-1165.

2. J. Rossmeisl, K. Dimitrievski, P. Siegbahn and J. K. Nørskov, *Journal of Physical Chemistry C*, 2007, 111, 18821-18823.

3. D. Friebe, M. W. Louie, M. Bajdich, K. E. Sanwald, Y. Cai, A. M. Wise, M. J. Cheng, D. Sokaras, T. C. Weng, R. Alonso-Mori, R. C. Davis, J. R. Bargar, J. K. Nørskov, A. Nilsson and A. T. Bell, *J. Am. Chem. Soc.*, 2015, 137, 1305-1313.
